# Supplementary material for: Theoretical investigation of H2S removal on γ-Al2O3 surfaces of different hydroxyl coverage
Source: Royal Society of Chemistry journal article supplement (doi:10.1039/c5ra05443e), 2015-01-01
Supplement: c5ra05443e1.pdf [file c5ra05443e1.pdf]

## Supporting Information

### Theoretical investigation of H<sub>2</sub>S removal on the $\gamma$ -Al<sub>2</sub>O<sub>3</sub> surfaces of different hydroxyl coverage

Table S1. The comparison of the calculated values at the different k-point mesh

|           | D100                                |                         |                                   |
|-----------|-------------------------------------|-------------------------|-----------------------------------|
|           | H <sub>2</sub> S, $E_{ad}$ (kJ/mol) | HS+H, $E_{ad}$ (kJ/mol) | TS1 <sub>a</sub> , $E_a$ (kJ/mol) |
| 3×3×1     | -32.52                              | -587.55                 | 13.22                             |
| 5×5×1     | -32.35                              | -587.36                 | 13.36                             |
| Deviation | 0.52%                               | 0.03%                   | 1.05%                             |
